# Supplementary material for: Synthesis of gold nanotubes with variable wall thicknesses
Source: Royal Society of Chemistry journal article supplement (doi:10.1039/c2ta00729k), 2012-11-22
Supplement: c2ta00729k.pdf [file c2ta00729k.pdf]

## Electronic Supporting Information

### Synthesis of Gold Nanotubes with Variable Wall Thicknesses

*Colin R. Bridges<sup>a</sup>, Paul M. DiCarmine<sup>a</sup>, Ana Fokina<sup>b</sup>, David Huesmann<sup>b</sup>, Dwight S. Seferos<sup>a\*</sup>*

<sup>a</sup>Department of Chemistry, University of Toronto, 80 St. George Street, Toronto, Ontario M5S 3H6, Canada.

<sup>b</sup>Department of Chemistry, Johannes-Gutenberg Universitat, Duesbergweg 10–14, 55099 Mainz,

Email Dwight S. Seferos: dseferos@chem.utoronto.ca

#### Contents:

|                                                                         |    |
|-------------------------------------------------------------------------|----|
| Fig. S1. Growth curve for gold nanotubes.....                           | S2 |
| Fig. S2. Extinction spectra of 200 nm diameter gold nanotubes.....      | S3 |
| Fig. S3. Extinction spectra of solution suspended gold nanotubes.....   | S4 |
| Fig. S4. SEM image of a core-shell gold nanotube with EDS analysis..... | S5 |

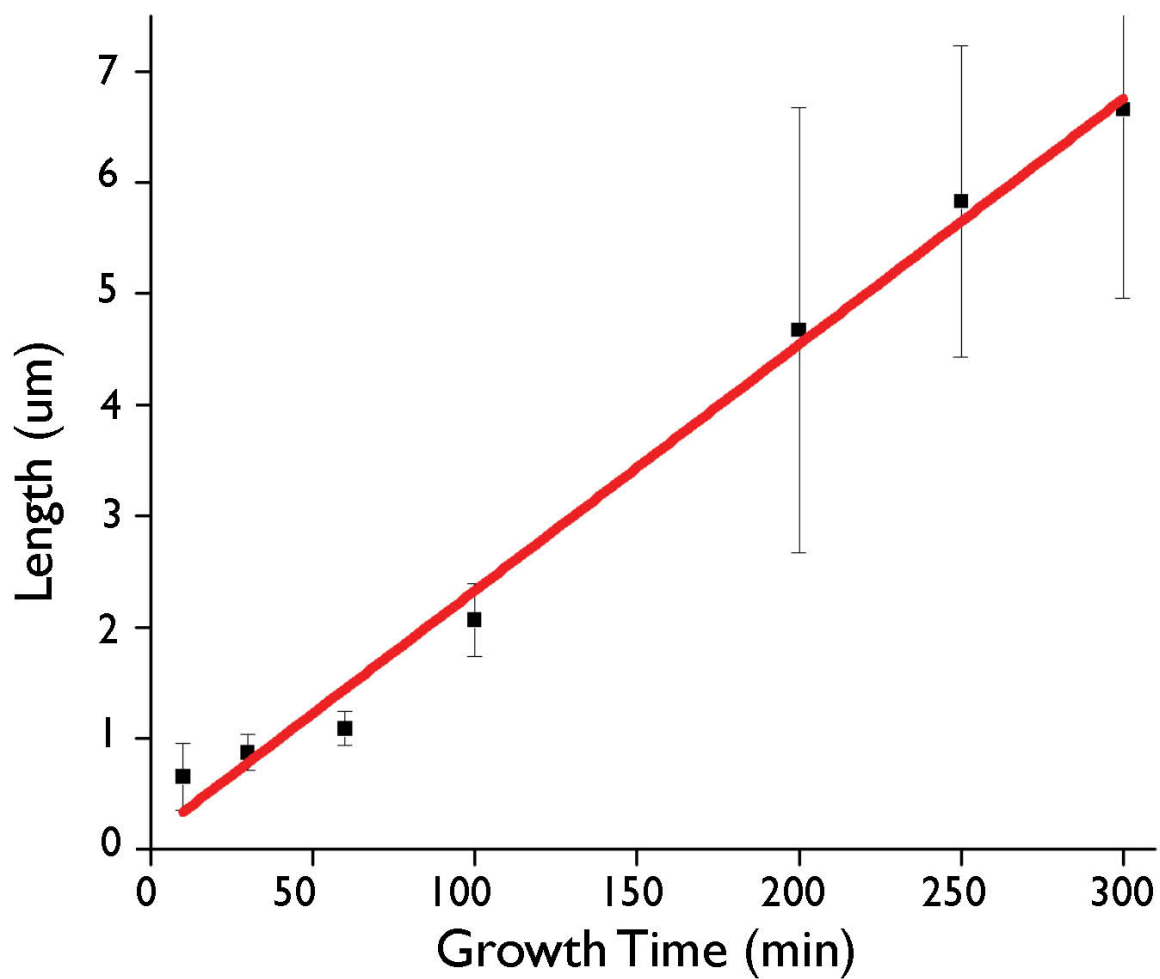

**Fig. S1** Growth curve of gold nanotubes. Error bars indicate one standard deviation of  $\sim 100$  length measurements from TEM analysis.

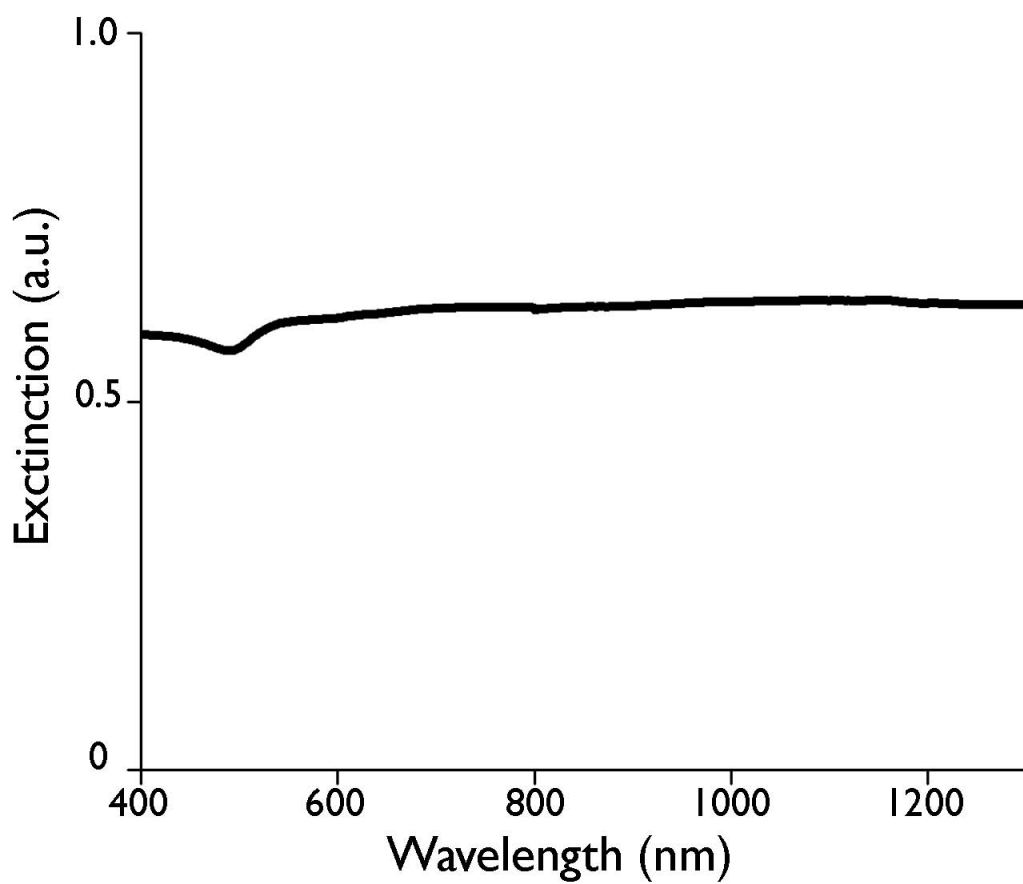

**Fig. S2** Extinction spectra of a solution of 200 nm gold nanotubes.

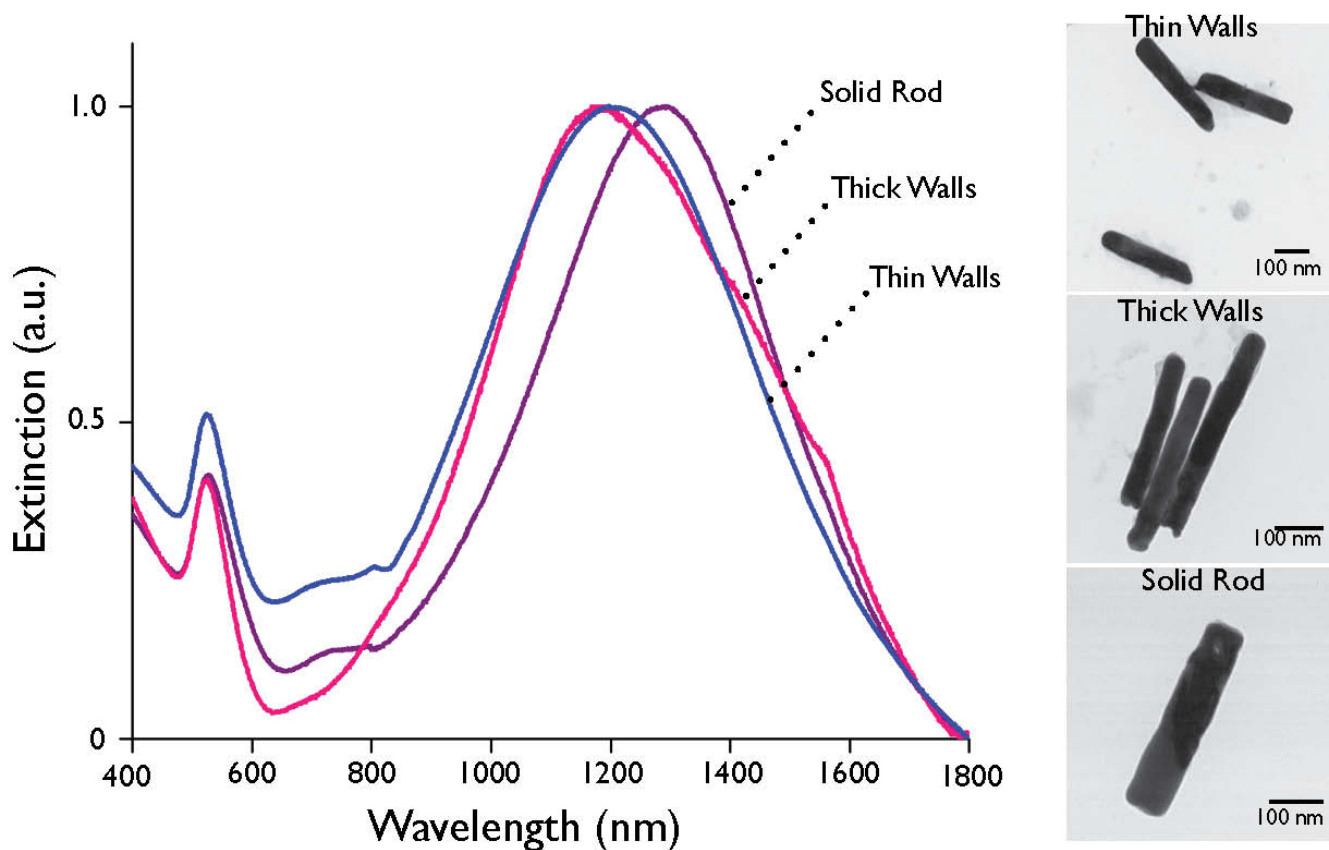

**Fig. S3** Extinction spectra of thick wall (poly(3-hexyl)thiophene core), thin wall (polythiophene core) gold nanotubes, and a gold nanorod in D<sub>2</sub>O. Polymer cores were electropolymerized in BF<sub>3</sub>·Et<sub>2</sub>O at +1500 mV vs. Ag/AgNO<sub>3</sub> for 10 minutes. Length ~250 nm and width ~50 nm for all samples.

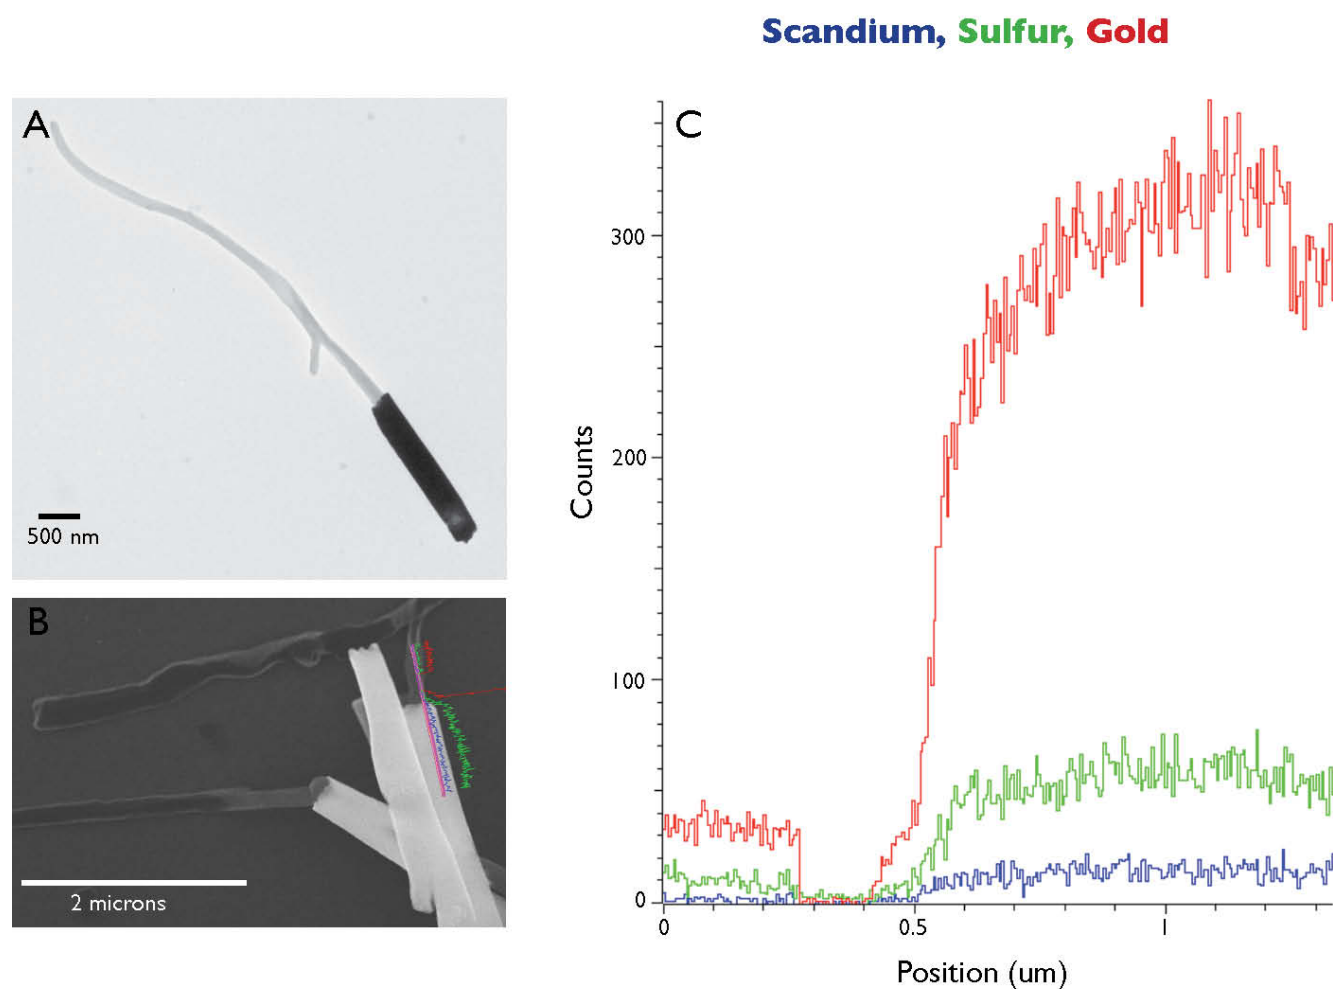

**Fig. S4** TEM (A) and SEM (B) image of a core-shell gold nanotube with a poly-3-hexylthiophene core. Elemental mapping of a line scan along a core-shell gold nanotube (C) taken from the line indicated in (B).
